# Supplementary material for: Smoking Cessation on Periodontal and Peri-Implant Health Status: A Systematic Review
Source: MDPI journal article supplement (doi:10.3390/dj10090162), 2022-08-31
Supplement: s1 [file s1]

**Table S1.** Studies excluded and reasons for exclusion.

| <b>Authors, year</b>          | <b>Reason for exclusion</b>                        |
|-------------------------------|----------------------------------------------------|
| Leite et al., 2019 [41]       | Review                                             |
| Souto et al., 2019 [42]       | Review                                             |
| Ramseier et al., 2020 [43]    | Review                                             |
| Gugnani et al., 2020 [44]     | Review                                             |
| Al Ansari et al., 2020 [45]   | Review                                             |
| Chambrone et al., 2010 [46]   | Review                                             |
| Chambrone et al., 2013 [47]   | Review                                             |
| Fiorini et al., 2014 [48]     | Review                                             |
| Holliday et al., 2021 [49]    | Review                                             |
| Alexandridi et al., 2018 [50] | Review                                             |
| Preshaw et al., 2005 [51]     | Studies without clinical/ radiographic parameters  |
| Shimazaki et al., 2006 [52]   | Prospective cohort study on cardiovascular disease |
| Peruzzo et al., 2016 [53]     | No ex-smokers included                             |
| Nemmar et al., 2021 [54]      | Studies without clinical/ radiographic parameters  |
| More et al., 2021 [55]        | Studies without clinical/ radiographic parameters  |
| Ravidà et al., 2020 [56]      | Dose-dependent effect of smoking                   |
| ALHarthi et al., 2018 [57]    | Studies without clinical/ radiographic parameters  |
